# Supplementary material for: Screening of prototype antiseizure and anti‐inflammatory compounds in the Theiler's murine encephalomyelitis virus model of epilepsy
Source: PubMed Central journal article supplement — Epilepsia Open. 2021 Nov 3;7(1):46–58. doi: 10.1002/epi4.12550 (PMC8886069; doi:10.1002/epi4.12550), 2021-11-03
Supplement: EPI4-7-46-s001.pdf [file EPI4-7-46-s001.pdf]

**Table S1.** Effect of Prototype Antiseizure Compounds on Seizure Burden in the TMEV Model: Seizures Observed at the Time of Drug Injection.

| <b>Compound</b>          | <b>Mechanism of Action</b>                    | <b>Mouse<br/>6 Hz (44 mA)<br/>ED<sub>50</sub><sup>a</sup></b> | <b>Dose<br/>mg/kg, IP</b> | <b>% VEH<br/>Cumulative Seizure<br/>Burden</b> |
|--------------------------|-----------------------------------------------|---------------------------------------------------------------|---------------------------|------------------------------------------------|
| Vehicle                  |                                               |                                                               |                           | 100 ± 24.7                                     |
| Carbamazepine            | <i>Na<sup>+</sup> Channel Blocker</i>         | 38.2                                                          | 40                        | 61.7 ± 18.7                                    |
| Lacosamide               | <i>Na<sup>+</sup> Channel Blocker</i>         | 12.9                                                          | 13                        | 18.3 ± 4.6**                                   |
| Lamotrigine <sup>b</sup> | <i>Na<sup>+</sup> Channel Blocker</i>         | 43.4                                                          | 20                        | 49.6 ± 10.3**                                  |
| Phenytoin                | <i>Na<sup>+</sup> Channel Blocker</i>         | 44.6                                                          | 20                        | 15.6 ± 4.5**                                   |
| Ezogabine                | <i>K<sup>+</sup> Channel Opener</i>           | 32.5                                                          | 20                        | 41.6 ± 13.4                                    |
| Clonazepam               | <i>GABA<sub>A</sub> Receptor Modulator</i>    | 0.17                                                          | 0.2                       | 60.4 ± 12.6                                    |
| Phenobarbital            | <i>GABA<sub>A</sub> Receptor Modulator</i>    | 35.3                                                          | 35                        | 1.7 ± 1.3****                                  |
| Tiagabine                | <i>GABA Reuptake Inhibition</i>               | 1.0                                                           | 1.3                       | 48.0 ± 7.6                                     |
| Ethosuximide             | <i>T-Type Ca<sup>++</sup> Channel Blocker</i> | 271                                                           | 300                       | 112 ± 20.2                                     |
| Gabapentin               | <i>α2δ Ca<sup>++</sup> Chanel Modulator</i>   | >500                                                          | 350                       | 9.8 ± 3.3****                                  |
| Levetiracetam            | <i>SV2A Ligand</i>                            | >1000                                                         | 1000                      | 11.3 ± 5.4****                                 |
| Topiramate               | <i>Mixed</i>                                  | >300                                                          | 300                       | 57.2 ± 8.8                                     |
| Valproic Acid            | <i>Mixed</i>                                  | 239                                                           | 239                       | 0.6 ± 0.6****                                  |

Vehicle (0.5% methylcellulose)

<sup>a</sup>Metcalf et al., 2017

<sup>b</sup>Lamotrigine was administered once daily (QD), whereas other compounds noted were administered twice daily (BID).

\*P<0.05, \*\*P<0.01, \*\*\*\*P<0.0001 compared to VEH seizure burden from the same testing cohort; Mann-Whitney U test.

The vehicle-treated group was in the same testing cohort as topiramate (300 mg/kg) and ethosuximide (300 mg/kg) and was representative of other vehicle treatment groups.
