# Supplementary material for: Screening of prototype antiseizure and anti‐inflammatory compounds in the Theiler's murine encephalomyelitis virus model of epilepsy
Source: PubMed Central journal article supplement — Epilepsia Open. 2021 Nov 3;7(1):46–58. doi: 10.1002/epi4.12550 (PMC8886069; doi:10.1002/epi4.12550), 2021-11-03
Supplement: EPI4-7-46-s002.pdf [file EPI4-7-46-s002.pdf]

**Table S3.** Effect of Prototype Anti-Inflammatory Compounds on Seizure Burden in the TMEV Model: Seizures Observed at the Time of Drug Injection.

| <b>Compound</b> | <b>Mechanism of Action</b> | <b>Dose mg/kg, IP</b> | <b>% VEH Cumulative Seizure Burden</b> |
|-----------------|----------------------------|-----------------------|----------------------------------------|
| Diclofenac      | <i>NSAID</i>               | 5                     | 74.2 ± 17.1                            |
|                 |                            | 10                    | 74.6 ± 19.8                            |
| Ibuprofen       | <i>NSAID</i>               | 10                    | 110 ± 14.0                             |
|                 |                            | 50                    | 60.8 ± 12.8                            |
| Celecoxib       | <i>Cox-2 inhibitor</i>     | 5                     | 69.5 ± 9.1*                            |
|                 |                            | 10                    | 73.7 ± 8.6*                            |
| Dexamethasone   | <i>Corticosteroid</i>      | 20                    | 38.3 ± 6.1****                         |
| Prednisone      | <i>Corticosteroid</i>      |                       |                                        |
|                 |                            | 5                     | 91.8 ± 15.0                            |
|                 |                            | 10                    | 108 ± 15.5                             |
|                 |                            | 20 <sup>a</sup>       | 68.3 ± 8.2*                            |
| Minocycline     | <i>Unknown</i>             | 50 <sup>a</sup>       | 58.0 ± 14.2                            |

<sup>a</sup>Compound was administered once daily (QD), whereas other compounds noted were administered twice daily (BID).

\*P<0.05, \*\*\*\*P<0.0001 compared to VEH seizure burden from the same testing cohort; Mann-Whitney U test.
