# Supplementary material for: Screening of prototype antiseizure and anti‐inflammatory compounds in the Theiler's murine encephalomyelitis virus model of epilepsy
Source: PubMed Central journal article supplement — Epilepsia Open. 2021 Nov 3;7(1):46–58. doi: 10.1002/epi4.12550 (PMC8886069; doi:10.1002/epi4.12550), 2021-11-03
Supplement: EPI4-7-46-s003.pdf [file EPI4-7-46-s003.pdf]

**Table S2.** Dose-Response Evaluation of Selected ASD Prototypes in the TMEV Model: Seizures Observed at the Time of Drug Injection.

| <b>Compound</b>  | <b>Dose<br/>mg/kg, IP</b> | <b>% VEH<br/>Cumulative Seizure<br/>Burden</b> |
|------------------|---------------------------|------------------------------------------------|
| Carbamazepine    | 10                        | 141 ± 19                                       |
|                  | 20                        | 72 ± 17                                        |
|                  | 40 <sup>a</sup>           | 40.6 ± 13.8                                    |
| Ethosuximide     | 300 <sup>a</sup>          | 112 ± 20.2                                     |
|                  | 400                       | 61.3 ± 12.6                                    |
| Levetiracetam    | 10                        | 54.1 ± 8.7                                     |
|                  | 30                        | 33.9 ± 7.5**                                   |
|                  | 350                       | 35.9 ± 7.0**                                   |
|                  | 700                       | 21.9 ± 4.9****                                 |
|                  | 1000 <sup>a</sup>         | 11.3 ± 5.4****                                 |
| Phenytoin        | 2.5                       | 112.9 ± 16.9                                   |
|                  | 5                         | 80.5 ± 17.4                                    |
|                  | 10                        | 84.0 ± 15.0                                    |
|                  | 20 <sup>a</sup>           | 15.6 ± 4.5**                                   |
| Ezogabine        | 15                        | 47.3 ± 16.2                                    |
|                  | 20 <sup>a</sup>           | 46.8 ± 8.1**                                   |
| Sodium Valproate | 50                        | 77.9 ± 18.4                                    |
|                  | 100                       | 51.3 ± 15.1                                    |
|                  | 200                       | 52.3 ± 15.9                                    |
|                  | 239 <sup>a</sup>          | 0.6 ± 0.6****                                  |
| Phenobarbital    | 20                        | 4.0 ± 3.0***                                   |
|                  | 35 <sup>a</sup>           | 1.7 ± 1.3****                                  |

<sup>a</sup>Data from Table 1.

\*\*P<0.01, \*\*\*P<0.001, \*\*\*\*P<0.0001 compared to VEH seizure burden from the same testing cohort; Mann-Whitney U test.
